# Supplementary material
Source: publisher figshare collection journal article supplement (https://diabetesjournals.figshare.com/ndownloader/files/26051837)
Supplement: Supplementary file 1 [file 26051837]

## Appendix 1

eTable 1. Number of Drug Claims identified from 2005-2018

|                                 | Year   |        |        |        |        |        |         |
|---------------------------------|--------|--------|--------|--------|--------|--------|---------|
|                                 | 2005   | 2006   | 2007   | 2008   | 2009   | 2010   | 2011    |
| No. of Identified T2DM's        | 358185 | 411200 | 493592 | 721157 | 881573 | 911309 | 1005876 |
| Number of Identified drug users | 168992 | 208808 | 259991 | 410976 | 555100 | 597414 | 676625  |
| Metformin                       | 62979  | 98675  | 112154 | 196064 | 360516 | 411050 | 490277  |
| Sulfonylurea                    | 82119  | 85101  | 99108  | 151730 | 180064 | 191934 | 217512  |
| Meglitinide                     | 11710  | 11521  | 10331  | 12690  | 13803  | 12064  | 11952   |
| AGI                             | 727    | 596    | 478    | 2031   | 2684   | 2620   | 2491    |
| Thiazolidinedione               | 62475  | 69008  | 80662  | 107742 | 121055 | 119279 | 112063  |
| DPP4                            | 0      | 3347   | 33569  | 60647  | 74423  | 73304  | 86736   |
| GLP1                            | 0      | 0      | 0      | 0      | 0      | 22147  | 42359   |
| SGLT2                           | 0      | 0      | 0      | 0      | 0      | 0      | 0       |
| Insulin                         | 5854   | 19025  | 38382  | 72738  | 86541  | 89195  | 98949   |
|                                 | Year   |        |        |        |        |        |         |
|                                 | 2012   | 2013   | 2014   | 2015   | 2016   | 2017   | 2018    |
| No. of Identified T2DM's        | 1E+06  | 791197 | 912840 | 724789 | 721115 | 694687 | 669072  |
| Number of Identified drug users | 673842 | 548083 | 649694 | 541372 | 549663 | 535052 | 516093  |
| Metformin                       | 500964 | 421564 | 508444 | 420162 | 427685 | 416202 | 399769  |
| Sulfonylurea                    | 220938 | 183426 | 211387 | 165976 | 160641 | 152247 | 143384  |
| Meglitinide                     | 10782  | 7378   | 7577   | 5238   | 4831   | 4414   | 4107    |
| AGI                             | 2132   | 1458   | 1653   | 1134   | 1492   | 1446   | 1423    |
| Thiazolidinedione               | 67219  | 40793  | 42750  | 33090  | 33842  | 33314  | 33646   |
| DPP4                            | 93970  | 73617  | 81537  | 73906  | 73368  | 71463  | 67295   |
| GLP1                            | 51743  | 45802  | 53939  | 63906  | 78901  | 91315  | 103684  |
| SGLT2                           | 0      | 12931  | 48467  | 76926  | 82551  | 90694  | 90984   |
| Insulin                         | 90691  | 66975  | 77990  | 77694  | 81610  | 77236  | 70263   |

eTable 2. Market share of each drug class (2005-2018)

|                   | Year  |       |       |
|-------------------|-------|-------|-------|
|                   | 2005  | 2012  | 2018  |
| Sulfonylurea      | 52.1% | 52.5% | 30.4% |
| Meglitinide       | 6.2%  | 1.8%  | 0.6%  |
| AGI               | 0.4%  | 0.1%  | 0.2%  |
| Thiazolidinedione | 41.4% | 11.9% | 6.8%  |
| DPP4              | 0.0%  | 21.4% | 14.5% |
| GLP1-RA           | 0.0%  | 11.7% | 25.5% |
| SGLT2             | 0.0%  | 0.7%  | 22.0% |

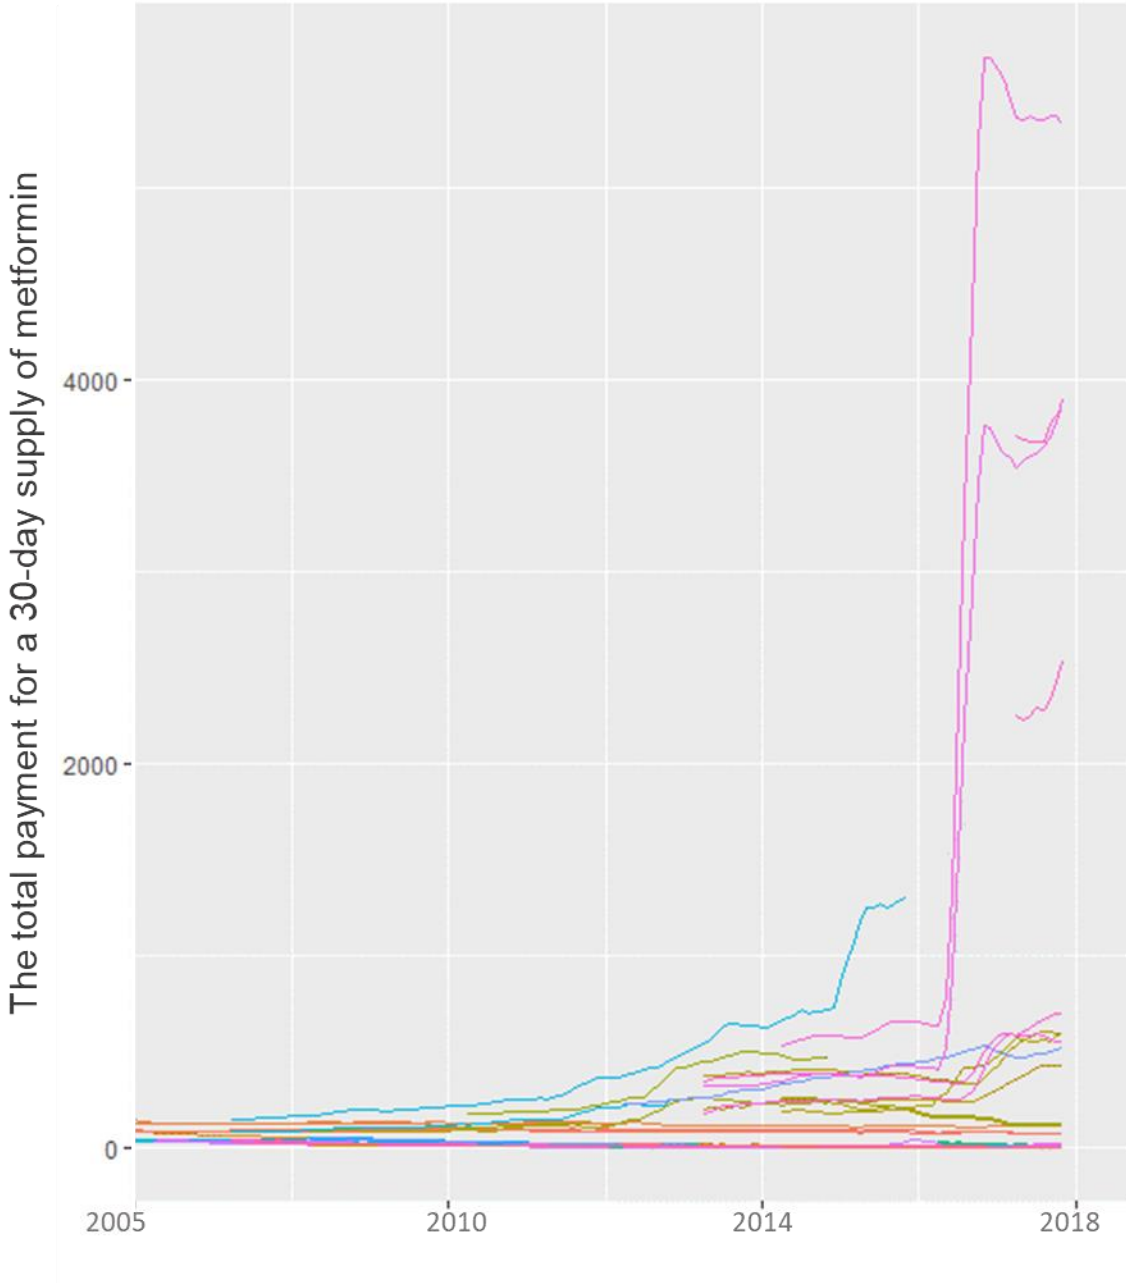

Figure 1. Payment for a 30-day supply of metformin under different brands.

## Appendix 2

STROBE Statement—Checklist of items that should be included in reports of *cross-sectional studies*

|                              | Item No | Recommendation                                                                                                                                                                                              |
|------------------------------|---------|-------------------------------------------------------------------------------------------------------------------------------------------------------------------------------------------------------------|
| <b>Title and abstract</b>    | 1       | (a) Indicate the study's design with a commonly used term in the title or the abstract <b>(Yes, title page and page 1)</b>                                                                                  |
|                              |         | (b) Provide in the abstract an informative and balanced summary of what was done and what was found <b>(Yes, page 1 -2)</b>                                                                                 |
| <b>Introduction</b>          |         |                                                                                                                                                                                                             |
| Background/rationale         | 2       | Explain the scientific background and rationale for the investigation being reported <b>(Yes, page 3)</b>                                                                                                   |
| Objectives                   | 3       | State specific objectives, including any prespecified hypotheses <b>(Yes, page 4)</b>                                                                                                                       |
| <b>Methods</b>               |         |                                                                                                                                                                                                             |
| Study design                 | 4       | Present key elements of study design early in the paper <b>(Yes, page 5)</b>                                                                                                                                |
| Setting                      | 5       | Describe the setting, locations, and relevant dates, including periods of recruitment, exposure, follow-up, and data collection <b>(Yes, page 4-5)</b>                                                      |
| Participants                 | 6       | (a) Give the eligibility criteria, and the sources and methods of selection of participants <b>(Yes, page 4-5)</b>                                                                                          |
| Variables                    | 7       | Clearly define all outcomes, exposures, predictors, potential confounders, and effect modifiers. Give diagnostic criteria, if applicable <b>(Yes, page 5-6)</b>                                             |
| Data sources/<br>measurement | 8*      | For each variable of interest, give sources of data and details of methods of assessment (measurement). Describe comparability of assessment methods if there is more than one group <b>(Yes, page 4-5)</b> |
| Bias                         | 9       | Describe any efforts to address potential sources of bias <b>(Yes, page 5-6)</b>                                                                                                                            |
| Study size                   | 10      | Explain how the study size was arrived at <b>(Yes, page 4-6)</b>                                                                                                                                            |
| Quantitative variables       | 11      | Explain how quantitative variables were handled in the analyses. If applicable, describe which groupings were chosen and why <b>(NA)</b>                                                                    |
| Statistical methods          | 12      | (a) Describe all statistical methods, including those used to control for confounding                                                                                                                       |
|                              |         | (b) Describe any methods used to examine subgroups and interactions                                                                                                                                         |
|                              |         | (c) Explain how missing data were addressed                                                                                                                                                                 |
|                              |         | (d) If applicable, describe analytical methods taking account of sampling strategy                                                                                                                          |
|                              |         | (e) Describe any sensitivity analyses <b>(Yes, page 5-6)</b>                                                                                                                                                |

### Results

|                          |     |                                                                                                                                                                                                                                                                                                                                                                                                                                                                                 |
|--------------------------|-----|---------------------------------------------------------------------------------------------------------------------------------------------------------------------------------------------------------------------------------------------------------------------------------------------------------------------------------------------------------------------------------------------------------------------------------------------------------------------------------|
| Participants             | 13* | (a) Report numbers of individuals at each stage of study—eg numbers potentially eligible, examined for eligibility, confirmed eligible, included in the study, completing follow-up, and analysed <b>(Yes, page 6)</b><br><hr/> (b) Give reasons for non-participation at each stage <b>(Yes, page 4)</b><br><hr/> (c) Consider use of a flow diagram <b>(etable1)</b>                                                                                                          |
| Descriptive data         | 14* | (a) Give characteristics of study participants (eg demographic, clinical, social) and information on exposures and potential confounders <b>(Yes, page 5)</b><br><hr/> (b) Indicate number of participants with missing data for each variable of interest <b>(NA, only records with complete information were included)</b>                                                                                                                                                    |
| Outcome data             | 15* | Report numbers of outcome events or summary measures <b>(Yes, page 6-7)</b>                                                                                                                                                                                                                                                                                                                                                                                                     |
| Main results             | 16  | (a) Give unadjusted estimates and, if applicable, confounder-adjusted estimates and their precision (eg, 95% confidence interval). Make clear which confounders were adjusted for and why they were included <b>(Yes, page 5)</b><br><hr/> (b) Report category boundaries when continuous variables were categorized <b>(NA)</b><br><hr/> (c) If relevant, consider translating estimates of relative risk into absolute risk for a meaningful time period <b>(Yes, page 7)</b> |
| Other analyses           | 17  | Report other analyses done—eg analyses of subgroups and interactions, and sensitivity analyses <b>(Yes, page 7)</b>                                                                                                                                                                                                                                                                                                                                                             |
| <b>Discussion</b>        |     |                                                                                                                                                                                                                                                                                                                                                                                                                                                                                 |
| Key results              | 18  | Summarise key results with reference to study objectives <b>(Yes, page 8)</b>                                                                                                                                                                                                                                                                                                                                                                                                   |
| Limitations              | 19  | Discuss limitations of the study, taking into account sources of potential bias or imprecision. Discuss both direction and magnitude of any potential bias <b>(Yes, page 11)</b>                                                                                                                                                                                                                                                                                                |
| Interpretation           | 20  | Give a cautious overall interpretation of results considering objectives, limitations, multiplicity of analyses, results from similar studies, and other relevant evidence <b>(Yes, page 11)</b>                                                                                                                                                                                                                                                                                |
| Generalisability         | 21  | Discuss the generalisability (external validity) of the study results <b>(Yes, page 10)</b>                                                                                                                                                                                                                                                                                                                                                                                     |
| <b>Other information</b> |     |                                                                                                                                                                                                                                                                                                                                                                                                                                                                                 |
| Funding                  | 22  | Give the source of funding and the role of the funders for the present study and, if applicable, for the original study on which the present article is based <b>(NA, no funding)</b>                                                                                                                                                                                                                                                                                           |

\*Give information separately for exposed and unexposed groups.
